# Supplementary material
Source: Springer Nature journal article supplement (https://www.springermedizin.de/resource/supplementary/12967_2013_1737_MOESM7_ESM.pdf/9575196)
Supplement: MOESM7 [file 9575196]

| <b>HPV16 E2</b> |                |                    |             |                |                    |
|-----------------|----------------|--------------------|-------------|----------------|--------------------|
| <b>Pool</b>     | <b>Peptide</b> | <b>Amino acids</b> | <b>Pool</b> | <b>Peptide</b> | <b>Amino acids</b> |
| <b>E2.1</b>     | E2-1           | 1–30               | <b>E2.2</b> | E2-13          | 181–210            |
|                 | E2-2           | 16–45              |             | E2-14          | 196–225            |
|                 | E2-3           | 31–60              |             | E2-15          | 211–240            |
|                 | E2-4           | 46–75              |             | E2-16          | 226–255            |
|                 | E2-5           | 61–90              |             | E2-17          | 241–270            |
|                 | E2-6           | 76–105             |             | E2-18          | 256–285            |
|                 | E2-7           | 91–120             |             | E2-19          | 271–300            |
|                 | E2-8           | 106–135            |             | E2-20          | 286–315            |
|                 | E2-9           | 121–150            |             | E2-21          | 301–330            |
|                 | E2-10          | 136–165            |             | E2-22          | 316–345            |
|                 | E2-11          | 151–180            |             | E2-23          | 331–365            |
|                 | E2-12          | 166–195            |             |                |                    |

| <b>HPV16 E6</b> |                |                    | <b>HPV16 E7</b> |                |                    |
|-----------------|----------------|--------------------|-----------------|----------------|--------------------|
| <b>Pool</b>     | <b>Peptide</b> | <b>Amino Acids</b> | <b>Pool</b>     | <b>Peptide</b> | <b>Amino Acids</b> |
| <b>E6.1</b>     | E6-1           | 1–32               | <b>E7.1</b>     | E7-1           | 1–35               |
|                 | E6-2           | 19–50              |                 | E7-2           | 22–56              |
| <b>E6.2</b>     | E6-3           | 37–68              | <b>E7.2</b>     | E7-3           | 43–77              |
|                 | E6-4           | 55–86              |                 | E7-4           | 64–98              |
| <b>E6.3</b>     | E6-5           | 73–104             |                 |                |                    |
|                 | E6-6           | 91–122             |                 |                |                    |
| <b>E6.4</b>     | E6-7           | 109–140            |                 |                |                    |
|                 | E6-8           | 127–158            |                 |                |                    |
